# Supplementary material for: Syntheses, crystal structures and supramolecular assemblies of two Cu(ii) complexes based on a new heterocyclic ligand: insights into C–H⋯Cl and π⋯π interactions
Source: Royal Society of Chemistry journal article supplement (doi:10.1039/d1ce01402a), 2022-01-01
Supplement: d1ce01402a1.pdf [file d1ce01402a1.pdf]

## Supporting Information

### **Syntheses, crystal structures and supramolecular assemblies of two Cu(II) complexes based on a new heterocyclic ligand: Insights through C–H...Cl and $\pi\cdots\pi$ interactions**

Samit Pramanik<sup>a</sup>, Sudipta Pathak<sup>\*,b</sup> Antonio Frontera<sup>\*,c</sup> and Subrata Mukhopadhyay<sup>a</sup>

<sup>a</sup>Department of Chemistry, Jadavpur University, Kolkata 7000032, West Bengal, India

<sup>b</sup>Department of Chemistry, Haldia Government College, Debhog, Purba Medinipur 721657, West Bengal, India

<sup>c</sup>Departament de Química, Universitat de les Illes Balears, Crta. de Valldemossa km 7.5, 07122 Palma de Mallorca (Balears), Spain

#### Table of Contents:

| Sl. No. | Contents                                                                                    | Page No. |
|---------|---------------------------------------------------------------------------------------------|----------|
| 1.      | Scheme S1 Synthetic route for the ligand, <b>N<sub>3</sub>L</b>                             | 2        |
| 2.      | Fig. S1 <sup>1</sup> H NMR spectrum of <b>N<sub>3</sub>L</b> in CDCl <sub>3</sub> solution  | 3        |
| 3.      | Fig. S2 <sup>13</sup> C NMR spectrum of <b>N<sub>3</sub>L</b> in CDCl <sub>3</sub> solution | 3        |
| 4.      | Fig. S3 FT-IR spectrum of <b>N<sub>3</sub>L</b>                                             | 4        |
| 5.      | Fig. S4 ESI-mass spectrum of <b>N<sub>3</sub>L</b>                                          | 4        |
| 6.      | Scheme S2 Schematic representations of the synthesis of complex <b>1</b> and <b>2</b>       | 5        |
| 7.      | Table S1 Crystal data and structure refinement parameters for Complex <b>1</b> and <b>2</b> | 6        |
| 8.      | Table S2 Selected bond distances [Å] for Complex <b>1</b> and <b>2</b>                      | 7        |

|     |                                                                                                                                                     |     |
|-----|-----------------------------------------------------------------------------------------------------------------------------------------------------|-----|
| 9.  | Table S3 Selected bond angles [°] for Complex <b>1</b> and <b>2</b>                                                                                 | 7   |
| 10. | Table S4 Geometrical parameters for the hydrogen bonds of Complex <b>1</b> and <b>2</b>                                                             | 7–8 |
| 11. | Table S5 Geometrical parameters (Å, °) for the $\pi$ -stacking interactions for the title Complexes                                                 | 8–9 |
| 12. | Fig. S5 FT-IR spectra for Complex <b>1</b> and <b>2</b>                                                                                             | 9   |
| 13. | Tau ( $\tau$ ) parameter calculations for Complex <b>1</b> and <b>2</b>                                                                             | 10  |
| 14. | Fig. S6 2D architecture through C–H $\cdots$ O hydrogen bonding and intramolecular anion $\cdots\pi$ interactions in Complex <b>2</b>               | 10  |
| 15. | Table S6 A brief comparison of structural features of substituted terpyridine derived Cu(II) complexes                                              | 11  |
| 16. | Table S7 A brief comparison of $\pi\cdots\pi$ and C–H $\cdots$ Cl hydrogen bonding interactions in substituted terpyridine derived Cu(II) complexes | 12  |
| 17. | Fig. S7 Hirshfeld surfaces mapped with (a) $d_{\text{norm}}$ (b) $d_e$ (c) $d_i$ (d) shape-index and (e) curvedness for the Complex <b>1</b> .      | 13  |
| 18. | Fig. S8 Hirshfeld surfaces mapped with (a) $d_{\text{norm}}$ (b) $d_e$ (c) $d_i$ (d) shape-index and (e) curvedness for the Complex <b>2</b>        | 13  |

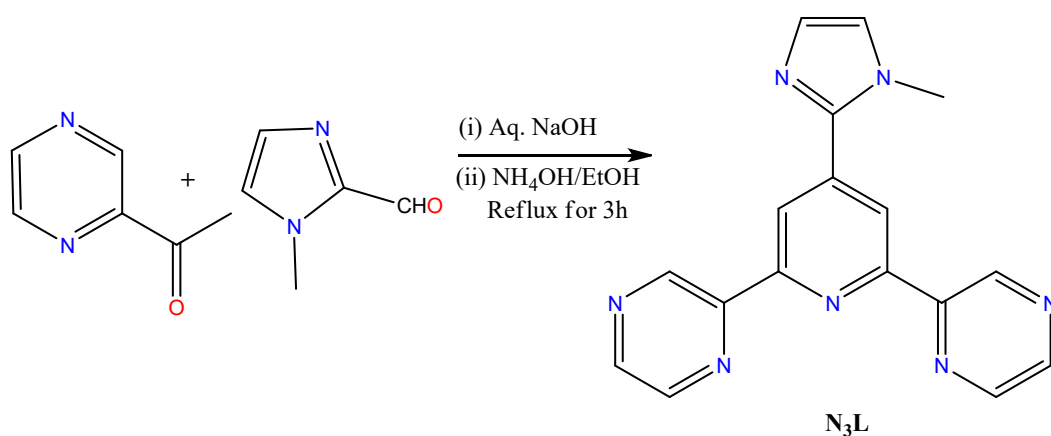

**Scheme S1** Synthetic route for the ligand, **N<sub>3</sub>L**

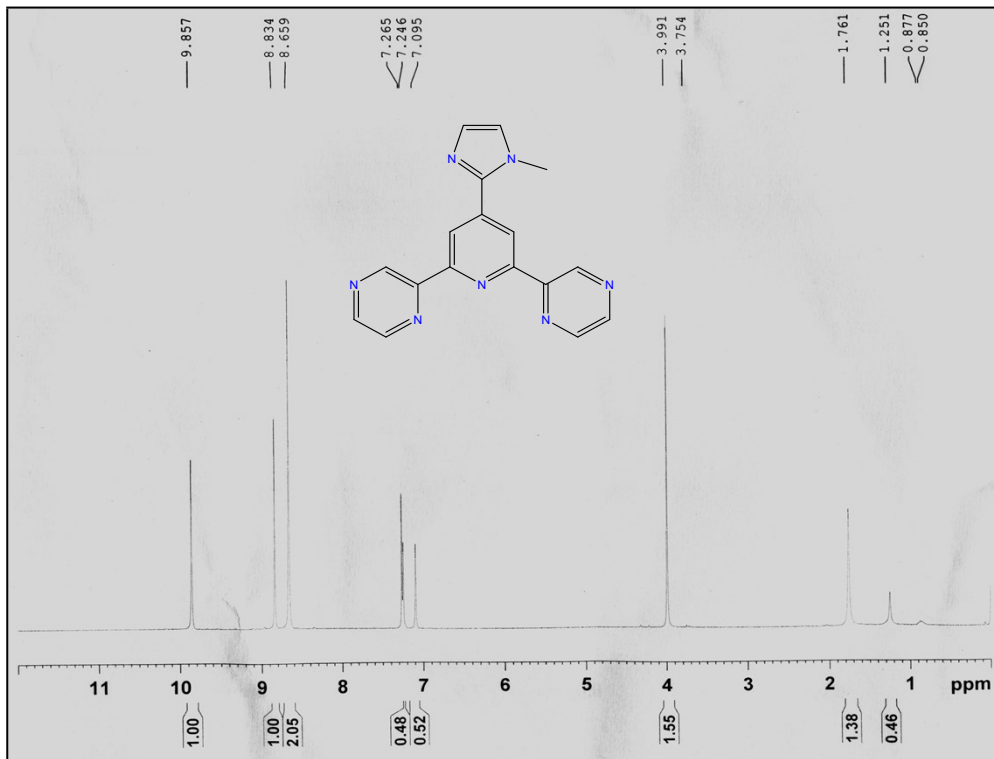

**Fig. S1**  $^1H$  NMR spectrum of  $N_3L$  in CDCl<sub>3</sub> solution

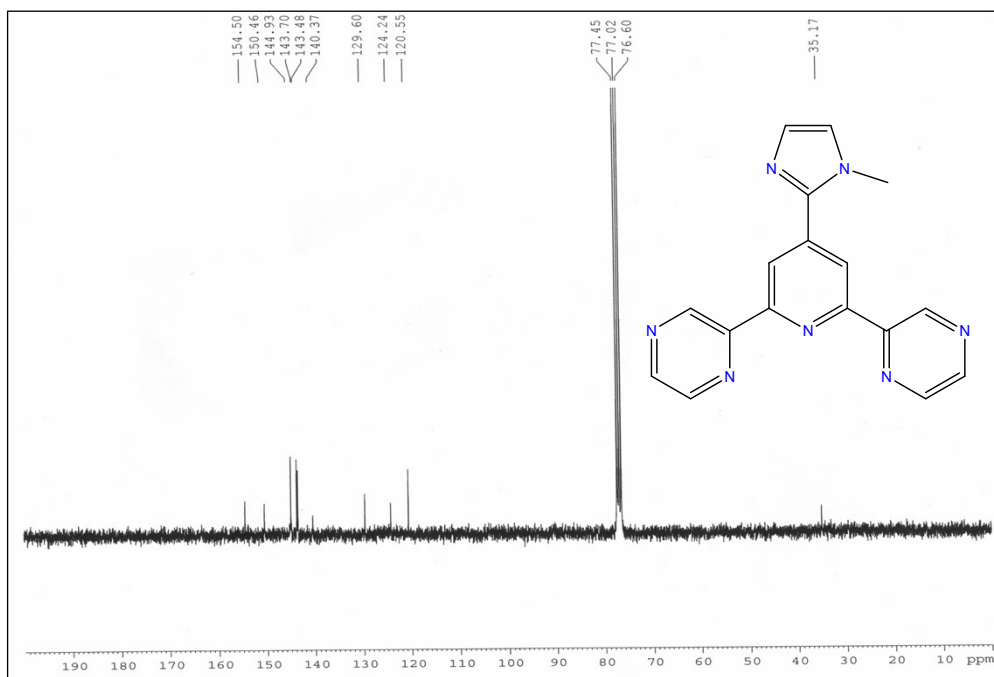

**Fig. S2**  $^{13}C$  NMR spectrum of  $N_3L$  in CDCl<sub>3</sub> solution

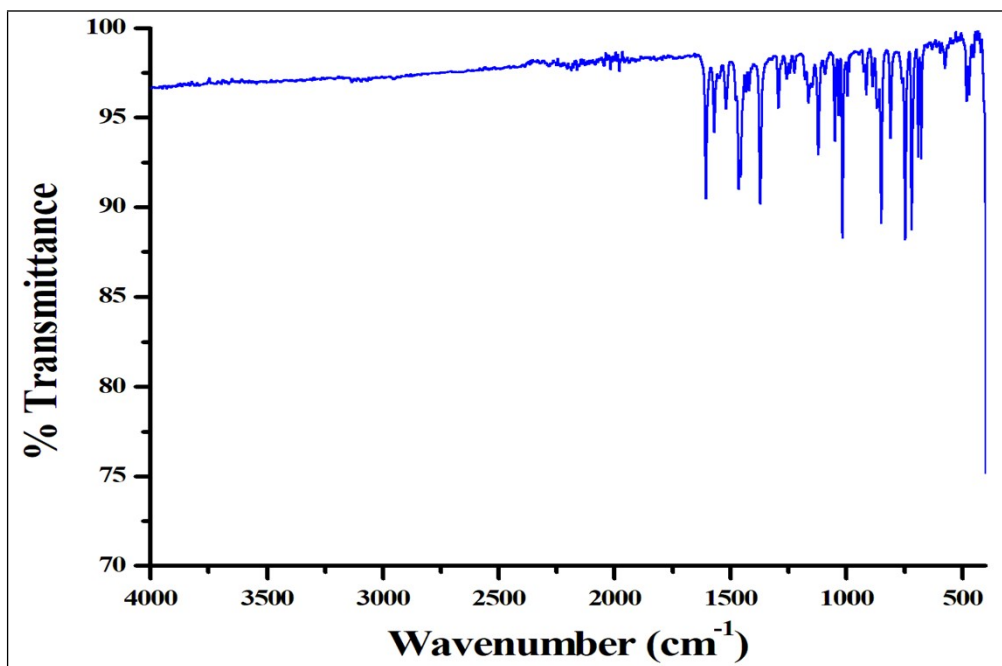

Fig. S3 FT-IR spectrum of N<sub>3</sub>L

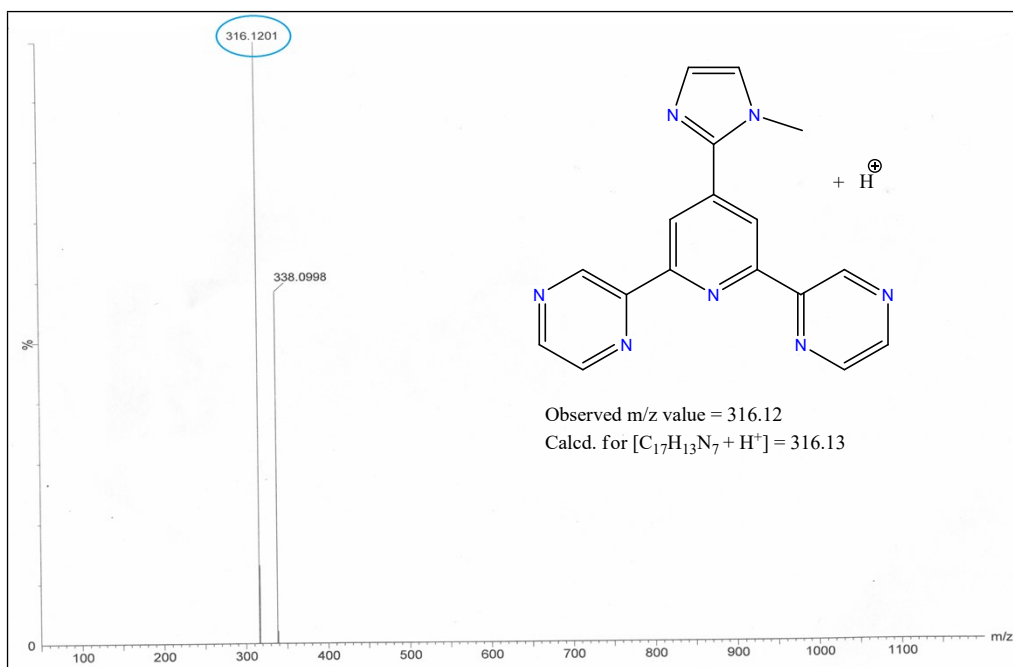

Fig. S4 ESI-mass spectrum of N<sub>3</sub>L

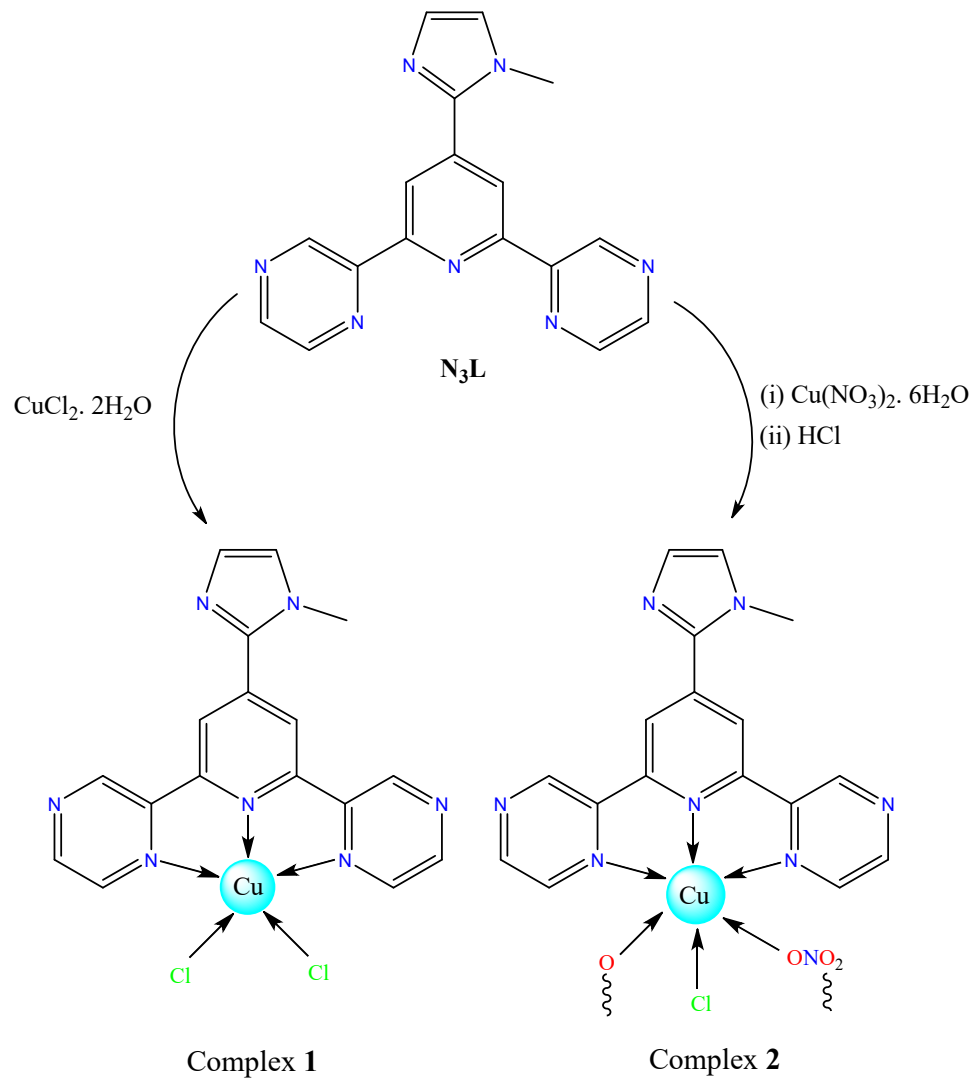

**Scheme S2** Schematic representations of the synthesis of complex 1 and 2

**Table S1 Crystal Data and Structure Refinement Parameters for Complex 1 and 2**

| Structure                                           | Complex 1                                                        | Complex 2                                                         |
|-----------------------------------------------------|------------------------------------------------------------------|-------------------------------------------------------------------|
| Empirical formula                                   | C <sub>17</sub> H <sub>13</sub> N <sub>7</sub> CuCl <sub>2</sub> | C <sub>17</sub> H <sub>13</sub> N <sub>8</sub> CuClO <sub>3</sub> |
| Formula Weight                                      | 449.79                                                           | 476.35                                                            |
| Temperature (K)                                     | 273(2)                                                           | 273(2)                                                            |
| Wavelength (Å)                                      | 0.71073                                                          | 0.71073                                                           |
| Crystal system                                      | Orthorhombic                                                     | Orthorhombic                                                      |
| space group                                         | P 2 <sub>1</sub> 2 <sub>1</sub> 2 <sub>1</sub>                   | P 2 <sub>1</sub> 2 <sub>1</sub> 2 <sub>1</sub>                    |
| a, b, c (Å)                                         | 7.0900(5), 15.0538(11),<br>16.4613(12)                           | 6.9172(9), 15.1342(19),<br>17.174(2)                              |
| α, β, γ (°)                                         | 90, 90, 90                                                       | 90, 90, 90                                                        |
| Volume (Å <sup>3</sup> )                            | 1756.9(2)                                                        | 1797.9(4)                                                         |
| Z / Density (calc.)<br>(Mg/m <sup>3</sup> )         | 4 / 1.701                                                        | 4 / 1.760                                                         |
| Absorption coefficient<br>(mm <sup>-1</sup> )       | 1.566                                                            | 1.405                                                             |
| F(000)                                              | 908.0                                                            | 964.0                                                             |
| Crystal size (mm <sup>3</sup> )                     | 0.09 × 0.14 × 0.19                                               | 0.08 × 0.13 × 0.19                                                |
| θ range for data<br>collection                      | 1.833 to 27.169                                                  | 1.794 to 27.173                                                   |
| Completeness to θ (%)                               | 100%                                                             | 100%                                                              |
| Absorption correction                               | Multi-scan                                                       | Multi-scan                                                        |
| Max. and min.<br>transmission                       | 0.869 and 0.769                                                  | 0.894 and 0.803                                                   |
| Refinement method                                   | Full-matrix least-squares<br>on F <sup>2</sup>                   | Full-matrix least-squares<br>on F <sup>2</sup>                    |
| Data/parameters                                     | 3883 / 288                                                       | 3979 / 272                                                        |
| Goodness-of-fit on F <sup>2</sup>                   | 0.790                                                            | 0.883                                                             |
| Final R indices [I ><br>2σ(I)]                      | R <sub>1</sub> = 0.0223, wR <sub>2</sub> =<br>0.0756             | R <sub>1</sub> = 0.0348, wR <sub>2</sub> = 0.1067                 |
| R indices (all data)                                | R <sub>1</sub> = 0.0265, wR <sub>2</sub> =<br>0.0881             | R <sub>1</sub> = 0.0383, wR <sub>2</sub> = 0.1122                 |
| Largest diff. peak and<br>hole (e.Å <sup>-3</sup> ) | 0.644 and -0.850                                                 | 0.485 and -0.382                                                  |

$R_1 = \frac{\sum ||F_o| - |F_c||}{\sum |F_o|}$ ,  $wR_2 = \left[ \frac{\sum \{(F_o^2 - F_c^2)^2\}}{\sum \{w(F_o^2)^2\}} \right]^{1/2}$ ,  $w = 1 / \{\sigma^2(F_o^2) + (aP)^2 + bP\}$ ,  $P = (F_o^2 + 2F_c^2) / 3$  where, a = 0.1000, b = 0.2438 for complex 1 and a = 0.1000, b = 0.8005 for complex 2.

**Table S2 Selected Bond Distances [Å] for Complex 1 and 2**

|           | Bonds   | Distance (Å) | Bonds    | Distance (Å) |
|-----------|---------|--------------|----------|--------------|
| Complex 1 | Cu1—Cl1 | 2.2495(9)    | Cu1—N5   | 1.963(2)     |
|           | Cu1—Cl2 | 2.3629(10)   | Cu1—N6   | 2.064(2)     |
|           | Cu1—N4  | 2.051(2)     |          |              |
| Complex 2 | Cu1—Cl1 | 2.1922(13)   | Cu1—N5   | 1.938(3)     |
|           | Cu1—O1  | 2.498(5)     | Cu1—N6   | 2.049(3)     |
|           | Cu1—N4  | 2.031(3)     | Cu1—O2 b | 2.641(4)     |

b = 1+x, y, z

**Table S3 Selected Bond Angles [°] for Complex 1 and 2**

|             | Bond angles  | Value (°)  | Bond angles | Value (°)  |
|-------------|--------------|------------|-------------|------------|
| Complex 1   | Cl1—Cu1—Cl2  | 110.32(3)  | N4—Cu1—N6   | 157.23(10) |
|             | Cl1—Cu1—N4   | 94.99(8)   | N5—Cu1—N6   | 78.79(9)   |
|             | Cl1—Cu1—N5   | 144.19(7)  | Cu1—N4—C8   | 114.12(19) |
|             | Cl1—Cu1—N6   | 99.45(8)   | Cu1—N4—C11  | 127.3(2)   |
|             | Cl2—Cu1—N4   | 97.91(8)   | Cu1—N5—C7   | 119.24(18) |
|             | Cl2—Cu1—N5   | 105.48(7)  | Cu1—N5—C16  | 119.47(18) |
|             | Cl2—Cu1—N6   | 93.48(8)   | Cu1—N6—C12  | 127.3(2)   |
|             | N4—Cu1—N5    | 79.20(9)   | Cu1—N6—C15  | 113.67(19) |
| Complex 2   | Cl1—Cu1—O1   | 102.68(12) | N5—Cu1—N6   | 79.67(13)  |
|             | Cl1—Cu1—N4   | 97.18(10)  | O2 b—Cu1—N5 | 81.91(18)  |
|             | Cl1—Cu1—N5   | 170.47(11) | O2 b—Cu1—N6 | 73.88(17)  |
|             | Cl1—Cu1—N6   | 103.20(10) | Cu1—O1—N8   | 122.8(3)   |
|             | Cl1—Cu1—O2 b | 90.11(15)  | Cu1 a—O2—N8 | 131.5(4)   |
|             | O1—Cu1—N4    | 97.98(15)  | Cu1—N4—C8   | 113.6(3)   |
|             | O1—Cu1—N5    | 86.77(15)  | Cu1—N4—C11  | 128.2(3)   |
|             | O1—Cu1—N6    | 79.06(14)  | Cu1—N5—C7   | 118.9(2)   |
|             | O1—Cu1—O2 b  | 152.10(17) | Cu1—N5—C16  | 119.5(3)   |
|             | N4—Cu1—N5    | 79.98(13)  | Cu1—N6—C12  | 127.5(3)   |
|             | N4—Cu1—N6    | 159.58(13) | Cu1—N6—C15  | 113.7(3)   |
| O2 b—Cu1—N4 | 104.97(17)   |            |             |            |

a = -1+x, y, z; b = 1+x, y, z

**Table S4 Geometrical Parameters for the Hydrogen Bonds of Complex 1 and 2**

|  | D—H···A     | D—H [Å] | H···A  | D···A [Å] | D—H···A [°] | Symmetry           |
|--|-------------|---------|--------|-----------|-------------|--------------------|
|  | C6—H6···Cl1 | 0.9300  | 2.8200 | 3.741(3)  | 171.00      | 1/2-x, 1-y, -1/2+z |

|           |               |         |         |          |        |                    |
|-----------|---------------|---------|---------|----------|--------|--------------------|
| Complex 1 | C9—H9···C11   | 0.92(3) | 2.55(3) | 3.464(3) | 176(3) | 1/2-x, 1-y, -1/2+z |
|           | C10—H10···C12 | 0.97(5) | 2.76(5) | 3.567(3) | 142(4) | 1-x, -1/2+y, 3/2-z |
|           | C13—H13···C12 | 0.98(3) | 2.83(3) | 3.770(3) | 162(3) | -1/2+x, 3/2-y, 2-z |
|           | C14—H14···C11 | 0.99(5) | 2.80(5) | 3.651(3) | 145(4) | -x, 1/2+y, 3/2-z   |
|           | C17—H17···C11 | 0.93(4) | 2.81(4) | 3.682(3) | 157(3) | -x, 1/2+y, 3/2-z   |
| Complex 2 | C1—H1B···C11  | 0.9600  | 2.7600  | 3.611(6) | 148.00 | 2-x, 1/2+y, 1/2-z  |
|           | C9—H9···C11   | 0.9300  | 2.4900  | 3.409(5) | 168.00 | 3/2-x, 1-y, 1/2+z  |
|           | C3—H3···O2    | 0.9300  | 2.5500  | 3.221(8) | 129.00 | 1/2+x, 3/2-y, 1-z  |
|           | C14—H14···O3  | 0.9300  | 2.2300  | 3.073(7) | 151.00 | 1-x, 1/2+y, 1/2-z  |

**Table S5 Geometrical Parameters (Å, °) for the  $\pi$ -Stacking Interactions for the Title Complexes**

|           | Cg(i)···Cg(j)    | Cg(i)···<br>Cg(j)[<br>Å] | $\alpha$ (°) | $\beta$ (°) | $\gamma$ (°) | Cg(i)–<br>perp[Å<br>] | Cg(j)–<br>perp[Å<br>] | Symmetry           |
|-----------|------------------|--------------------------|--------------|-------------|--------------|-----------------------|-----------------------|--------------------|
| Complex 1 | Cg(3)[1]···Cg(5) | 3.6866(18)               | 2.71         | 25.2<br>9   | 26.0<br>0    | 3.313                 | 3.333                 | -1/2+x, 3/2-y, 1-z |
|           | Cg(3)[1]···Cg(5) | 3.5021(18)               | 2.71         | 11.4<br>0   | 10.1<br>7    | 3.447                 | 3.433                 | 1/2+x, 3/2-y, 1-z  |
|           | Cg(4)[1]···Cg(6) | 3.958(2)                 | 22.8<br>0    | 19.2<br>0   | 41.0<br>5    | 2.985                 | 3.738                 | -x, -1/2+y, 3/2-z  |
|           | Cg(5)[1]···Cg(3) | 3.5020(18)               | 2.71         | 10.1<br>7   | 11.4<br>0    | 3.433                 | 3.447                 | -1/2+x, 3/2-y, 1-z |
|           | Cg(5)[1]···Cg(3) | 3.6867(18)               | 2.71         | 26.0<br>0   | 25.2<br>9    | 3.333                 | 3.313                 | 1/2+x, 3/2-y, 1-z  |
|           | Cg(6)[1]···Cg(4) | 3.958(2)                 | 22.8<br>0    | 41.0<br>5   | 19.2<br>0    | 3.738                 | 2.985                 | -x, 1/2+y, 3/2-z   |



|           |                |          |      |      |      |       |       |                    |
|-----------|----------------|----------|------|------|------|-------|-------|--------------------|
| Complex 2 | Cg(3)[1]⋯Cg(5) | 3.733(3) | 8.82 | 21.6 | 19.5 | 3.518 | 3.470 | -1/2+x, 3/2-y, 1-z |
|           | Cg(3)[1]⋯Cg(5) | 3.905(3) | 8.82 | 35.7 | 31.6 | 3.323 | 3.170 | 1/2+x, 3/2-y, 1-z  |
|           | Cg(4)[1]⋯Cg(6) | 3.826(3) | 12.8 | 22.3 | 34.2 | 3.161 | 3.539 | 2-x, -1/2+y, 1/2-z |
|           | Cg(5)[1]Cg⋯(3) | 3.905(3) | 8.82 | 31.6 | 3.17 | 35.72 | 3.323 | -1/2+x, 3/2-y, 1-z |
|           | Cg(5)[1]⋯Cg(3) | 3.733(3) | 8.82 | 19.5 | 21.6 | 3.470 | 3.518 | 1/2+x, 3/2-y, 1-z  |
|           | Cg(6)[1]⋯Cg(4) | 3.825(3) | 12.8 | 34.2 | 22.3 | 3.538 | 3.160 | 2-x, 1/2+y, 1/2-z  |

Cg(i) and Cg(j) denotes centroid of  $i^{\text{th}}$  and  $j^{\text{th}}$  ring respectively. For Complex 1: Cg(3) is the centroid of [N1/C2/C3/N2/C4] ring; Cg(4) is the centroid of [N3/C9/C8/N4/C11/C10] ring; Cg(5) is the centroid of [N5/C7/C6/C5/C17/C16] ring; and Cg(6) is the centroid of [N6/C12/C13/N7/C14/C15] ring. For Complex 2: Cg(3) is the centroid of [N1/C2/C3/N2/C4] ring; Cg(4) is the centroid of [N3/C9/C8/N4/C11/C10] ring; Cg(5) is the centroid of [N5/C7/C6/C5/C17/C16] ring; and Cg(6) is the centroid of [N6/C12/C13/N7/C14/C15] ring.

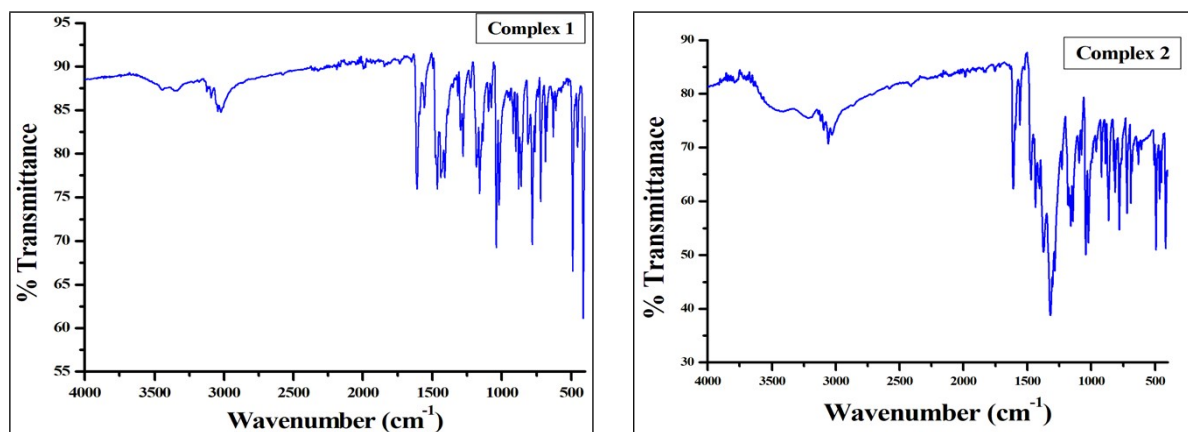

Fig. S5 FT-IR spectra for Complex 1 and 2

### Tau ( $\tau$ ) parameter calculation for complex 1

The structures with five coordination number can have either square pyramidal or triangular bipyramidal geometry around the metal center. In order to discriminate between these two geometries, tau ( $\tau$ ) parameter was proposed by Addison and co-workers. According to this, the  $\tau$  parameter ranges between 0 and 1 at the extreme values giving a perfect square pyramidal and triangular bipyramidal structures, respectively. The closer the  $\tau$  parameter to 0, the more similar it is to square pyramidal geometry.

$$\tau = (\beta - \alpha) / 60 \dots\dots\dots (S1)$$

Where,  $\beta$  is the first greatest angle and  $\alpha$  is the second greatest angle of the coordination center.

For complex 1:  $\beta = 157.23(10)$ , and  $\alpha = 144.19(7)$  (Table S3). Hence, calculated value of  $\tau = 0.217$ .

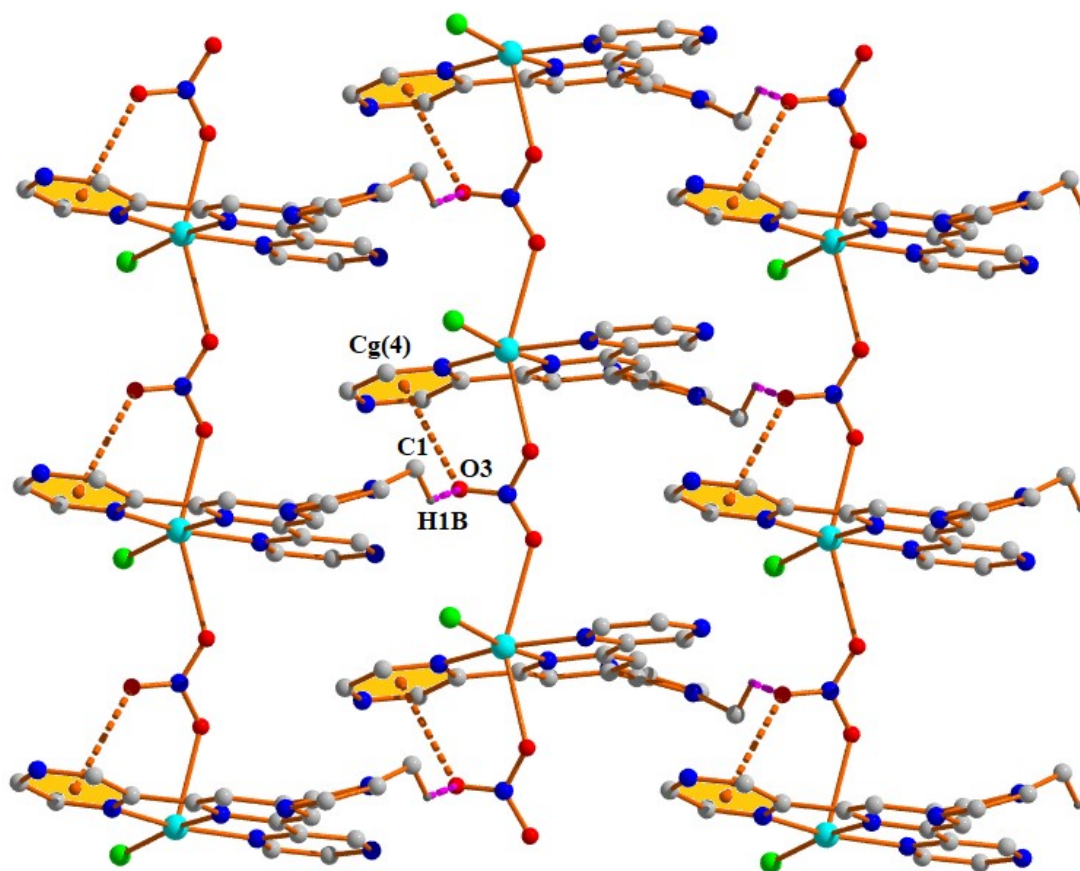

**Fig. S6** Perspective view of 2D architecture through C–H $\cdots$ O hydrogen bonding and intramolecular anion $\cdots\pi$  interactions in complex 2 (other aromatic H atoms have been omitted for clarity).

**Table S6 A brief comparison of structural features of substituted terpyridine derived Cu(II) complexes**

| <b>Complex</b>                                                                                          | <b>Geometry</b>                               | <b>Donor chromophore(s)</b>                                       | <b>Axial bond length(s) (Å)</b> | <b>Shifting of central metal from basal plane (Å)</b> | <b>Reference</b> |
|---------------------------------------------------------------------------------------------------------|-----------------------------------------------|-------------------------------------------------------------------|---------------------------------|-------------------------------------------------------|------------------|
| C <sub>20</sub> H <sub>15</sub> Cl <sub>2</sub> CuN <sub>7</sub> ( <b>3</b> )                           | Square pyradimal (τ=0.018)                    | N <sub>3</sub> Cl <sub>2</sub>                                    | 2.421                           | 0.320                                                 | 65               |
| C <sub>38</sub> H <sub>26</sub> Cl <sub>6</sub> Cu <sub>3</sub> N <sub>10</sub> ( <b>4</b> )            | Square pyradimal (τ=0.013) and square planner | N <sub>3</sub> Cl <sub>2</sub> and N <sub>2</sub> Cl <sub>2</sub> | 2.491                           | 0.310                                                 | 66               |
| C <sub>20</sub> H <sub>12</sub> ClCuN <sub>5</sub> O <sub>2</sub> , 2.25(H <sub>2</sub> O) ( <b>5</b> ) | Square pyradimal (τ=0.27)                     | N <sub>3</sub> OCl                                                | 2.507                           | 0.117                                                 | 67               |
| C <sub>18</sub> H <sub>12</sub> Cl <sub>2</sub> CuN <sub>6</sub> ( <b>6</b> )                           | Square pyradimal (τ=0.034)                    | N <sub>3</sub> Cl <sub>2</sub>                                    | 2.464                           | 0.328                                                 | 68               |
| C <sub>18</sub> H <sub>12</sub> Cl <sub>2</sub> CuN <sub>6</sub> ( <b>7</b> )                           | Square pyradimal (τ=0.064)                    | N <sub>3</sub> Cl <sub>2</sub>                                    | 2.443                           | 0.353                                                 | 68               |
| C <sub>22</sub> H <sub>16</sub> Cl <sub>2</sub> CuN <sub>6</sub> O ( <b>8</b> )                         | Square pyradimal (τ=0.014)                    | N <sub>3</sub> Cl <sub>2</sub>                                    | 2.508                           | 0.316                                                 | 38               |
| C <sub>23</sub> H <sub>18</sub> Cl <sub>2</sub> CuN <sub>6</sub> O ( <b>9</b> )                         | Square pyradimal (τ=0.090)                    | N <sub>3</sub> Cl <sub>2</sub>                                    | 2.444                           | 0.335                                                 | 38               |
| C <sub>17</sub> H <sub>13</sub> N <sub>7</sub> CuCl <sub>2</sub> ( <b>1</b> )                           | Square pyradimal (τ=0.217)                    | N <sub>3</sub> Cl <sub>2</sub>                                    | 2.363                           | 0.437                                                 | Present work     |
| C <sub>17</sub> H <sub>13</sub> N <sub>8</sub> CuClO <sub>3</sub> ( <b>2</b> )                          | Distorted octahedral                          | N <sub>3</sub> O <sub>2</sub> Cl                                  | 2.498 and 2.641                 | 0.082                                                 | Present work     |

**Table S7 A brief comparison of  $\pi\cdots\pi$  and C–H $\cdots$ Cl hydrogen bonding interactions in substituted terpyridine derived Cu(II) complexes**

| <b>Complex</b>                                                                                             | <b><math>\pi\cdots\pi</math> distance(s) (Å)</b>  | <b>H<math>\cdots</math>Cl distance(s) (Å)</b> | <b>References</b> |
|------------------------------------------------------------------------------------------------------------|---------------------------------------------------|-----------------------------------------------|-------------------|
| C <sub>20</sub> H <sub>15</sub> Cl <sub>2</sub> CuN <sub>7</sub> ( <b>3</b> )                              | 3.6894(16), 3.6139(17),<br>3.5590(18), 3.8731(18) | 2.8200, 2.5900, 2.7600,<br>2.4400             | 65                |
| C <sub>38</sub> H <sub>26</sub> Cl <sub>6</sub> Cu <sub>3</sub> N <sub>10</sub> ( <b>4</b> )               | 3.377(3), 3.891(3),<br>3.908(3), 3.851(3)         | 2.7900, 2.8000, 2.6500,<br>2.5400             | 66                |
| C <sub>20</sub> H <sub>12</sub> ClCuN <sub>5</sub> O <sub>2</sub> ,<br>2.25(H <sub>2</sub> O) ( <b>5</b> ) | 3.7762(17)                                        | 2.6700                                        | 67                |
| C <sub>18</sub> H <sub>12</sub> Cl <sub>2</sub> CuN <sub>6</sub> ( <b>6</b> )                              | 3.518(3)                                          | 2.6500, 2.6700, 2.7300,<br>2.6200             | 68                |
| C <sub>18</sub> H <sub>12</sub> Cl <sub>2</sub> CuN <sub>6</sub> ( <b>7</b> )                              | 3.524(5), 3.815(4),<br>3.781(5), 3.740(5)         | 2.7300, 2.7800, 2.6600                        | 68                |
| C <sub>22</sub> H <sub>16</sub> Cl <sub>2</sub> CuN <sub>6</sub> O ( <b>8</b> )                            | 3.6577(18), 3.8775(16),<br>3.6104(15)             | 2.7400, 2.7600, 2.8000                        | 38                |
| C <sub>23</sub> H <sub>18</sub> Cl <sub>2</sub> CuN <sub>6</sub> O ( <b>9</b> )                            | 3.9847(13), 3.9986(14),<br>3.8486(15)             | 2.6100, 2.7100, 2.8200,                       | 38                |
| C <sub>17</sub> H <sub>13</sub> N <sub>7</sub> CuCl <sub>2</sub> ( <b>1</b> )                              | 3.5020(18), 3.6867(18),<br>3.958(2)               | 2.55(3), 2.76(5), 2.80(5),<br>2.8200          | Present<br>work   |
| C <sub>17</sub> H <sub>13</sub> N <sub>8</sub> CuClO <sub>3</sub> ( <b>2</b> )                             | 3.733(3), 3.826(3),<br>3.905(3)                   | 2.4900, 2.7600                                | Present<br>work   |

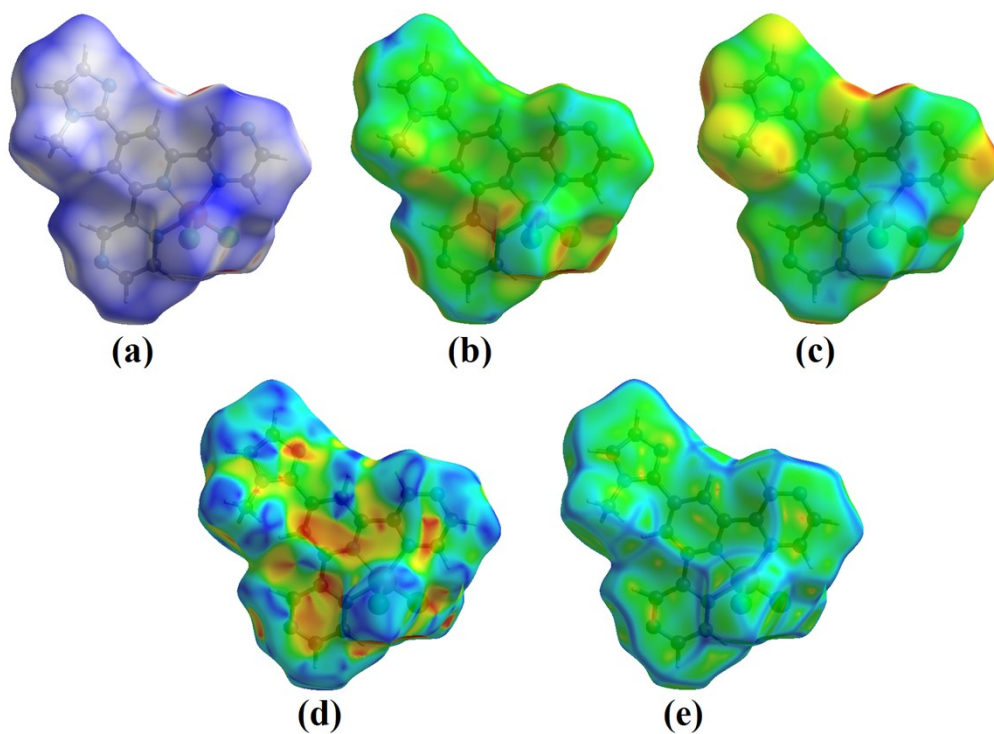

**Fig. S7** Hirshfeld surfaces mapped with (a)  $d_{\text{norm}}$  (b)  $d_e$  (c)  $d_i$  (d) shape-index and (e) curvedness for the complex **1**.

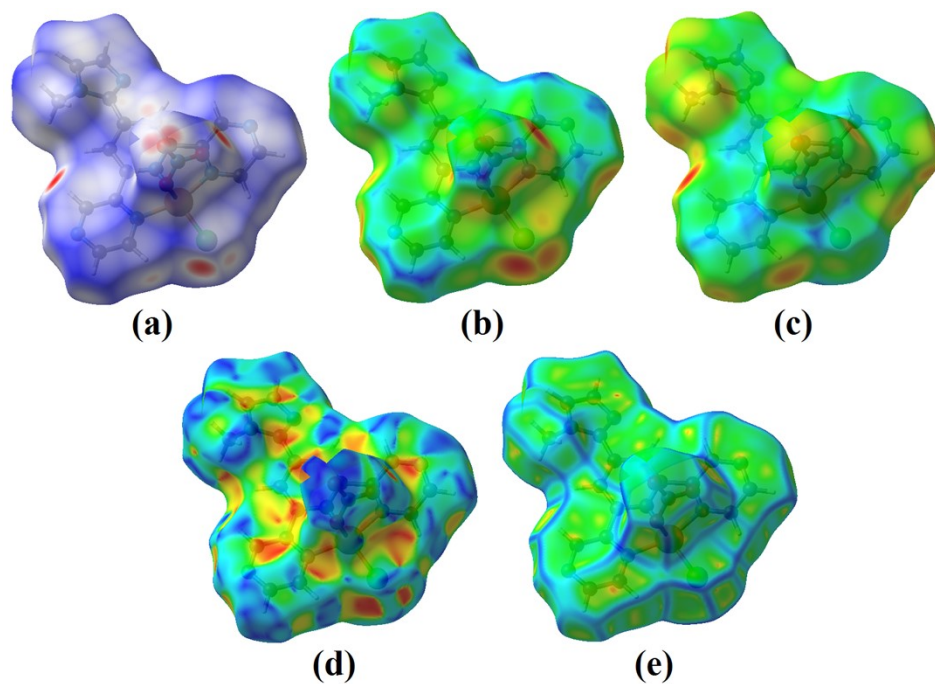

**Fig. S8** Hirshfeld surfaces mapped with (a)  $d_{\text{norm}}$  (b)  $d_e$  (c)  $d_i$  (d) shape-index and (e) curvedness for the complex **2**.
